# Supplementary material for: Single Nucleotide Polymorphisms Associated with AA-Amyloidosis in Siamese and Oriental Shorthair Cats
Source: MDPI journal article supplement (doi:10.3390/genes14122126), 2023-11-25
Supplement: s1 [file s1]

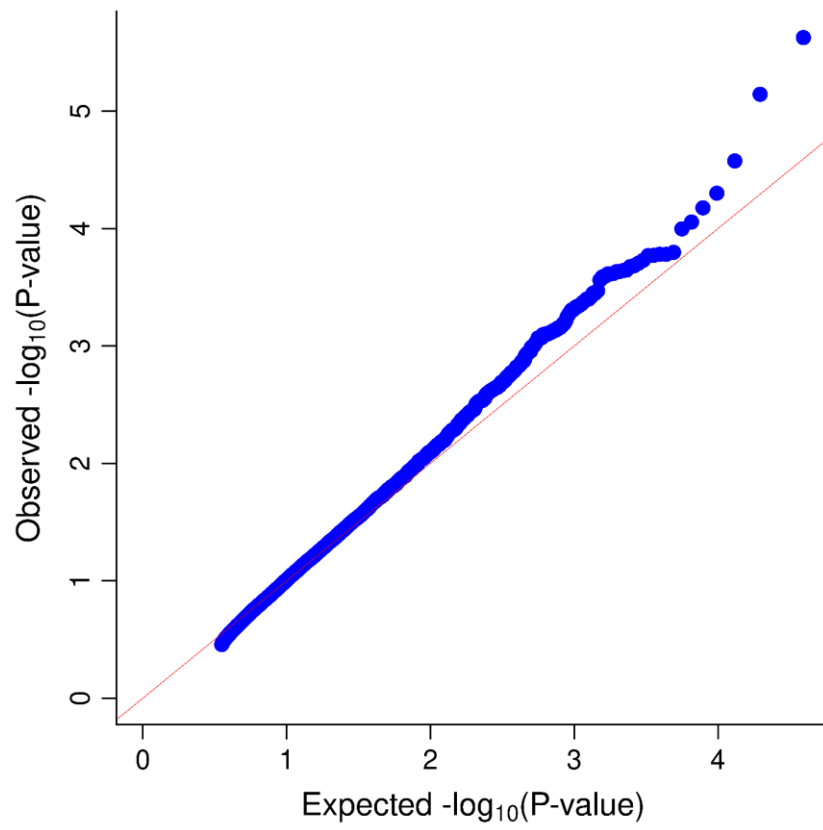

**Figure S2.** Quantile-quantile (Q-Q) plot of expected P-values versus observed P-values of the multi-locus GWAS for hereditary AA-amyloidosis in mixed Siamese/Oriental cats. The blue dots represent the included 39,246 SNPs and the red line indicates the distribution of the SNPs under the null hypothesis of no association.
