# Supplementary material for: Single Nucleotide Polymorphisms Associated with AA-Amyloidosis in Siamese and Oriental Shorthair Cats
Source: MDPI journal article supplement (doi:10.3390/genes14122126), 2023-11-25
Supplement: s1 [file s1]

**Table S5.** Number of significant SNPs detected by multi-locus methods, estimates of total phenotypic variance and GWAS-SNP residual variance of hereditary AA-amyloidosis in mixed Siamese/Oriental cats.

| Method         | Number of SNPs | Phenotypic variance | GWAS-SNP-residual variance |
|----------------|----------------|---------------------|----------------------------|
| mrMLM          | 4              | 0.2067              | 0.0183                     |
| FASTmrMLM      | 5              | 0.2067              | 0.0366                     |
| FASTmrEMMA     | 4              | 0.2067              | 0.0424                     |
| pLARmEB        | 4              | 0.2067              | 0.034                      |
| ISIS EM-BLASSO | 4              | 0.2067              | 0.0294                     |
