# Supplementary material for: Single Nucleotide Polymorphisms Associated with AA-Amyloidosis in Siamese and Oriental Shorthair Cats
Source: MDPI journal article supplement (doi:10.3390/genes14122126), 2023-11-25
Supplement: s1 [file s1]

**Table S3.** Considerations for identifying significant SNPs in this study depending on the correlation coefficient ( $r$ ) between a SNP locus that perfectly matches the disease causing SNP locus and correlated SNP loci.

| Correlation coefficient | Genotype distribution        |    |    |                              |    |    | $p$ -Value |
|-------------------------|------------------------------|----|----|------------------------------|----|----|------------|
|                         | Genotypes of controls (n=48) |    |    | Genotypes of affected (n=20) |    |    |            |
|                         | 11                           | 12 | 22 | 11                           | 12 | 22 |            |
| 1.0                     | 0                            | 24 | 24 | 20                           | 0  | 0  | 1.714e-15  |
| 0.9566                  | 0                            | 24 | 24 | 18                           | 1  | 1  | 1.747e-13  |
| 0.9146                  | 0                            | 24 | 24 | 16                           | 2  | 2  | 1.247e-11  |
| 0.8740                  | 0                            | 24 | 24 | 14                           | 3  | 3  | 6.490e-10  |
| 0.8345                  | 0                            | 24 | 24 | 12                           | 4  | 4  | 2.500e-8   |
| 0.7960                  | 0                            | 24 | 24 | 10                           | 5  | 5  | 7.760e-7   |
| 0.7583                  | 0                            | 24 | 24 | 8                            | 6  | 6  | 1.883e-5   |
| 0.7212                  | 0                            | 24 | 24 | 6                            | 7  | 7  | 3.719e-4   |
