# Supplementary material for: Single Nucleotide Polymorphisms Associated with AA-Amyloidosis in Siamese and Oriental Shorthair Cats
Source: MDPI journal article supplement (doi:10.3390/genes14122126), 2023-11-25
Supplement: s1 [file s1]

**Table S6.** Phenotypic variance explained (PVE) by identified SNPs by multi-locus methods associated with hereditary AA-amyloidosis in mixed Siamese/Oriental cats.

| Method         | SNP ID                 | PVE SNP | Total PVE of all detected SNPS |
|----------------|------------------------|---------|--------------------------------|
| mrMLM          | <b>CHRA1.33307498</b>  | 26.61   | 93.55                          |
|                | <b>CHRA1.87876182</b>  | 12.22   |                                |
|                | CHRB1.204283203        | 7.55    |                                |
|                | <b>CHRD1.112359805</b> | 11.86   |                                |
|                | CHRD2.3894331          | 11.55   |                                |
|                | <b>CHRA1.170535359</b> | 5.39    |                                |
|                | CHRE2.26012148         | 10.75   |                                |
|                | CHRF1.2996541          | 7.62    |                                |
| FASTmrMLM      | <b>CHRA1.33307498</b>  | 28.50   | 65.05                          |
|                | <b>CHRA1.87876182</b>  | 4.21    |                                |
|                | <b>CHRUN5.1424878</b>  | 15.65   |                                |
|                | <b>CHRD1.112359805</b> | 1.96    |                                |
|                | <b>CHRD2.113529492</b> | 14.73   |                                |
| FASTmrEMMA     | <b>CHRA1.33307498</b>  | 16.75   | 40.58                          |
|                | <b>CHRA1.87876182</b>  | 3.74    |                                |
|                | CHRA1.169994536        | 6.05    |                                |
|                | <b>CHRD1.83154354</b>  | 3.23    |                                |
|                | <b>CHRD2.113529492</b> | 10.81   |                                |
| pLARmEB        | <b>CHRA1.35096216</b>  | 17.36   | 87.74                          |
|                | CHRA1.168026137        | 7.98    |                                |
|                | CHRA1.223820842        | 7.01    |                                |
|                | CHRA2.179873843        | 9.23    |                                |
|                | <b>CHRD1.83154354</b>  | 8.47    |                                |
|                | CHRD1.104974246        | 16.12   |                                |
|                | <b>CHRD1.112359805</b> | 5.01    |                                |
|                | <b>CHRD2.113529492</b> | 16.56   |                                |
| ISIS EM-BLASSO | <b>CHRA1.35096216</b>  | 18.54   | 83.91                          |
|                | CHRC2.4289851          | 5.71    |                                |
|                | <b>CHRUN5.1424878</b>  | 15.35   |                                |
|                | <b>CHRD2.113529492</b> | 27.57   |                                |
|                | <b>CHRA1.170535359</b> | 10.35   |                                |
|                | CHRX.13778263          | 6.39    |                                |

SNPs in bold have been detected by at least two methods simultaneously, PVE SNP: Percentage of phenotypic variance explained of each SNP identified by method, Total PVE: Percentage of phenotypic variance explained of all SNPs identified by method.
