# Supplementary material for: Single Nucleotide Polymorphisms Associated with AA-Amyloidosis in Siamese and Oriental Shorthair Cats
Source: Genes (Basel). 2023 Nov 25;14(12):2126. doi: 10.3390/genes14122126 (PMC10742459; doi:10.3390/genes14122126)
Supplement: Supplementary file 1 [file genes-14-02126-s001.zip]

Archive with 12 entries (12 files):
- Figure_S1_Pedigree.jpg
- Figure_S2_QQPlot.pdf
- Figure_S3_genemania_network_55genes_in_genomic_regions.jpg
- Figure_S4_genemania_network_8putative_candidate_genes.jpg
- Table_S1_68_animals_and_amyloidosis_status.xlsx
- Table_S2_Localization_of_amyloid_deposits.xlsx
- Table_S3_Comparison of power to detect significant SNPs.pdf
- Table_S4_SNPs_significantly_associated_with_AA-amyloidosis..xlsx
- Table_S5_phenotypic_variance_residual_variance.pdf
- Table_S6_PVE.pdf
- Table_S7_Distribution_of_AA-amyloidosis_by_genotypes.xlsx
- Table_S8_Putative_candidate_genes_1MbUpDownRegion_selectedSNPs.xlsx
