# Supplementary material for: Single Nucleotide Polymorphisms Associated with AA-Amyloidosis in Siamese and Oriental Shorthair Cats
Source: Genes (Basel). 2023 Nov 25;14(12):2126. doi: 10.3390/genes14122126 (PMC10742459; doi:10.3390/genes14122126)
Supplement: Supplementary file 1 [file genes-14-02126-s001.zip › Table_S1_68_animals_and_amyloidosis_status.xlsx]

## Sheet: S1
Table S1. Animals included in the multi-locus GWAS and their amyloidosis status.
Entry biobank	Status	Sex	Breed	Age/Age at death	Amyloid A validation	Entry pathology
1	case	w	OSH	6	X	F/17/000585/S
2	case	m	OSH	4	X	F/17/000103/S
3	case	w	SIA	6		F/19/000656/S
4	case	w	OSH	2		F/15/000199/S
5	case	m	OSH	5		F/19/001142/S
6	case	w	OSH	1		F/16/000163/S
7	case	w	OSH	4	X	F/21/000524/S
8	case	m	OSH	6	X	F/22/000715/S
9	case	m	OSH	4		F/18/000894/S
10	case	w	OSH	3	X	F/18/000659/S
11	case	w	OSH	3		F/18/005558/E
12	case	m	OSH	2	X	F/18/000090/S
13	case	m	OSH	5	X	F/22/000256/S
14	case	w	OSH	4	X	F/21/000021/S
15	case	w	OSH	5		F/23/000361/S
16	case	w	OSH	4	X	F/22/000232/S
17	clin	w	OSH	4
18	clin	w	OSH	6
19	clin	w	OSH	4
20	clin	m	OSH	1
21	control	m	SIA	17
22	control	w	OSH	15
23	control	m	OSH	18
24	control	w	SIA	17
25	control	m	SIA	15
26	control	w	SIA	15
27	control	m	SIA	15
28	control	m	SIA	17
29	control	w	SIA	16
30	control	w	OSH	12
31	control	w	OSH	14
32	control	m	SIA	14
33	control	w	SIA	15
34	control	m	OSH	12
35	control	m	OSH	11
36	control	m	OSH	≥10
37	control	m	OSH	11
38	control	m	SIA	12
39	control	w	SIA	15
40	control	w	OSH	≥12
41	control	m	OSH	11
42	control	m	OSH	11
43	control	w	OSH	11
44	control	w	SIA	10
45	control	m	OSH	13
46	control	m	OSH	13
47	control	m	OSH	11
48	control	w	OSH	13
49	control	w	OSH	10
50	control	m	OSH	13
51	control	m	OSH	13
52	control	m	OSH	13
53	control	w	OSH	10
54	control	w	OSH	13
55	control	w	OSH	13
56	control	m	OSH	11
57	control	w	OSH	11
58	control	w	SIA	10
59	control	m	SIA	13
60	control	w	SIA	11
61	control	w	SIA	13
62	control	w	SIA	≥10
63	control	m	OSH	10
64	control	w	SIA	10
65	control	w	SIA	12
66	control	w	OSH	10
67	control	m	OSH	15
68	control	m	SIA	≥10
