# Supplementary material for: Single Nucleotide Polymorphisms Associated with AA-Amyloidosis in Siamese and Oriental Shorthair Cats
Source: Genes (Basel). 2023 Nov 25;14(12):2126. doi: 10.3390/genes14122126 (PMC10742459; doi:10.3390/genes14122126)
Supplement: Supplementary file 1 [file genes-14-02126-s001.zip › Table_S2_Localization_of_amyloid_deposits.xlsx]

## Sheet: S2
Table S2. Localization of amyloid deposits in amyloidosis affected Siamese/Oriental cats.
Tissue	Total affected/Number examined	Percentage affected/examined
Thyroid	16/16	100.00 %
Liver	15/16	93.75 %
Kidney	10/16	62.50 %
Pancreas	9/15	60.00 %
Spleen	9/16	56.25 %
Intestine	7/15	46.67 %
Adrenal gland	5/15	33.33 %
Stomach	5/15	33.33 %
Bladder	3/15	20.00 %
Lymph node	3/16	18.75 %
Parathyroid	2/15	13.33 %
Oesophagus	2/15	13.33%
Heart	2/16	12.50 %
Fat tissue	1/15	6.67%
Salivary gland	1/15	6.67%
Blood vessel	1/15	6.67%
Conjunctiva	1/15	6.67%
