# Supplementary material for: Single Nucleotide Polymorphisms Associated with AA-Amyloidosis in Siamese and Oriental Shorthair Cats
Source: Genes (Basel). 2023 Nov 25;14(12):2126. doi: 10.3390/genes14122126 (PMC10742459; doi:10.3390/genes14122126)
Supplement: Supplementary file 1 [file genes-14-02126-s001.zip › Table_S4_SNPs_significantly_associated_with_AA-amyloidosis..xlsx]

## Sheet: Table S4
Table S4. SNPs significantly associated with AA-amyloidosis in Siamese/Oriental cats.
Trait name	Method	RS#	Chromosome	Marker position (bp)	QTN effect	LOD score	'-log10(P)'	r2 (%)	MAF	Genotype for code 1
Amyloidosis	mrMLM	CHRA1.87876182	1	74,262,275	-0.1968	7.2141	8.0848	12.2203	0.3939	G
Amyloidosis	mrMLM	CHRA1.33307498	1	29,635,172	0.2767	12.6467	13.6341	26.6125	0.3561	G
Amyloidosis	mrMLM	CHRB1.204283203	4	187,844,376	-0.1495	3.2455	3.9560	7.5468	0.3409	T
Amyloidosis	mrMLM	CHRD1.112359805	10	75,099,182	0.1854	6.3793	7.2248	11.8608	0.2348	C
Amyloidosis	mrMLM	CHRD2.3894331	11	9,704,561	-0.2017	7.1762	8.0458	11.5543	0.4242	G
Amyloidosis	mrMLM	CHRA1.170535359	12	12,578,042	-0.1357	3.3183	4.0331	5.3879	0.4394	C
Amyloidosis	mrMLM	CHRE2.26012148	15	18,710,954	0.1845	8.4053	9.3075	10.7469	0.4394	G
Amyloidosis	mrMLM	CHRF1.2996541	17	4,031,408	0.1571	3.1395	3.8436	7.6175	0.1667	C
Amyloidosis	FASTmrMLM	CHRA1.33307498	1	29,635,172	0.2444	5.3978	6.2094	28.4993	0.3456	G
Amyloidosis	FASTmrMLM	CHRA1.87876182	1	74,262,275	-0.0986	4.3044	5.0705	4.2127	0.3971	G
Amyloidosis	FASTmrMLM	CHRUN5.1424878	10	30,498,477	-0.1799	5.1951	5.9989	15.6521	0.3088	A
Amyloidosis	FASTmrMLM	CHRD1.112359805	10	75,099,182	0.0643	3.4877	4.2123	1.9551	0.2279	C
Amyloidosis	FASTmrMLM	CHRD2.113529492	11	84,125,513	-0.1752	6.3241	7.1678	14.7293	0.3456	T
Amyloidosis	FASTmrEMMA	CHRA1.33307498	1	29,635,172	0.5381	10.2724	11.2163	16.745	0.3456	G
Amyloidosis	FASTmrEMMA	CHRA1.87876182	1	74,262,275	-0.2686	3.8837	4.6294	3.7355	0.3971	G
Amyloidosis	FASTmrEMMA	CHRA1.169994536	1	129,425,784	-0.3478	4.62	5.4003	6.0486	0.3529	T
Amyloidosis	FASTmrEMMA	CHRD1.83154354	10	52,619,208	0.2534	3.0722	3.772	3.229	0.4485	G
Amyloidosis	FASTmrEMMA	CHRD2.113529492	11	84,125,513	-0.4198	6.7668	7.6243	10.8145	0.3456	T
Amyloidosis	pLARmEB	CHRA1.35096216	1	31,080,887	0.191	3.7764	4.5166	17.3555	0.2868	G
Amyloidosis	pLARmEB	CHRA1.168026137	1	128,073,737	-0.1421	5.4705	6.2848	7.9838	0.4412	G
Amyloidosis	pLARmEB	CHRA1.223820842	1	182,772,587	-0.1248	5.4163	6.2286	7.0104	0.3382	G
Amyloidosis	pLARmEB	CHRA2.179873843	2	117,179,695	-0.1392	4.1689	4.9287	9.2275	0.2721	T
Amyloidosis	pLARmEB	CHRD1.83154354	10	52,619,208	0.1511	4.2022	4.9636	8.4699	0.4485	G
Amyloidosis	pLARmEB	CHRD1.104974246	10	69,577,616	0.184	3.7058	4.4423	16.1197	0.2941	T
Amyloidosis	pLARmEB	CHRD1.112359805	10	75,099,182	0.1037	5.5869	6.4054	5.0137	0.2279	C
Amyloidosis	pLARmEB	CHRD2.113529492	11	84,125,513	-0.1872	6.2914	7.1341	16.5635	0.3456	T
Amyloidosis	ISIS EM-BLASSO	CHRA1.35096216	1	31,080,887	0.2033	6.0544	6.8893	18.5447	0.2868	G
Amyloidosis	ISIS EM-BLASSO	CHRC2.4289851	9	3,847,209	-0.118	4.2011	4.9624	5.7095	0.3897	A
Amyloidosis	ISIS EM-BLASSO	CHRUN5.1424878	10	30,498,477	-0.1849	6.8366	7.6963	15.3476	0.3088	A
Amyloidosis	ISIS EM-BLASSO	CHRD2.113529492	11	84,125,513	-0.2487	13.3533	14.3521	27.5706	0.3456	T
Amyloidosis	ISIS EM-BLASSO	CHRA1.170535359	12	12,578,042	-0.1666	6.9111	7.773	10.3477	0.4412	C
Amyloidosis	ISIS EM-BLASSO	CHRX.13778263	23	11,400,464	-0.1193	5.7006	6.5232	6.3936	0.3309	T
