# Supplementary material for: Single Nucleotide Polymorphisms Associated with AA-Amyloidosis in Siamese and Oriental Shorthair Cats
Source: Genes (Basel). 2023 Nov 25;14(12):2126. doi: 10.3390/genes14122126 (PMC10742459; doi:10.3390/genes14122126)
Supplement: Supplementary file 1 [file genes-14-02126-s001.zip › Table_S7_Distribution_of_AA-amyloidosis_by_genotypes.xlsx]

## Sheet: Table S7
Table S7. Distribution (%) of AA-amyloidosis-affected Siamese/Oriental cats by their genotypes of significantly associated SNPs.
SNP-ID		Genotype
CHRA1.33307498		33	34	44
	Distribution of cases (%)	60.00	8.00	0.00
	No of genotypes	30	25	9
SNP-ID		Genotype
CHRA1.35096216		11	13	33
	Distribution of cases (%)	0.00	7.41	54.55
	No of genotypes	4	27	33
SNP-ID		Genotype
CHRA1.87876182		11	13	33
	Distribution of cases (%)	33.33	51.61	4.35
	No of genotypes	9	31	23
SNP-ID		Genotype
CHRUN5.1424878		11	21	22
	Distribution of cases (%)	5.88	45.83	87.50
	No of genotypes	34	24	8
SNP-ID		Genotype
CHRD1.83154354		11	13	33
	Distribution of cases (%)	0.00	20.59	72.22
	No of genotypes	11	34	18
SNP-ID		Genotype
CHRD1.112359805		22	42	44
	Distribution of cases (%)	46.15	8.33	0.00
	No of genotypes	39	24	2
SNP-ID		Genotype
CHRD2.113529492		22	24	44
	Distribution of cases (%)	70.00	48.00	3.23
	No of genotypes	10	25	31
SNP-ID		Genotype
CHRA1.170535359		22	42	44
	Distribution of cases (%)	0.00	31.43	75.00
	No of genotypes	20	35	12
