# Supplementary material for: Single Nucleotide Polymorphisms Associated with AA-Amyloidosis in Siamese and Oriental Shorthair Cats
Source: Genes (Basel). 2023 Nov 25;14(12):2126. doi: 10.3390/genes14122126 (PMC10742459; doi:10.3390/genes14122126)
Supplement: Supplementary file 1 [file genes-14-02126-s001.zip › Table_S8_Putative_candidate_genes_1MbUpDownRegion_selectedSNPs.xlsx]

## Sheet: Table S8
Table S8. Putative candidate genes located 1 Mb upstream and downstream of significant SNPs on the reference genome F. catus_Fca126_mat1.0 (release 06-May-2021, PRJNA773801).
					Cat gene		Human orthologue
FCA	Associated SNP-ID	SNP-Position	Location SNP	Genomic region screened (FCA)	Gene name/Gene ID	Location	Gene name and Gene ID	Location	Related functions as reported	Additional information
A1	CHRA1.33307498	29,635,172	intergenic between SUGT1 and CNMD	A1:28,635,171-30,635,172	VWA8	28,665,963-29,034,082	VWA8 (ENSG00000102763)	13:41566835-41961120
					RGCC	29,088,118-29,101,714	RGCC (ENSG00000102760)	13:41457550-41470871
					NAA16	29,145,555-29,209,707	NAA16 (ENSG00000172766)	13:41311267-41377030
					MTRF1	29,209,078-29,280,047	MTRF1 (ENSG00000120662)	13:41216369-41263577
					KBTBD7	29,288,986-29,294,053	KBTBD7 (ENSG00000120696)	13:41189834-41194569
					WBP4	29,392,540-29,469,538	WBP4 (ENSG00000120688)	13:41061509-41084006
					ELF1	29,469,586-29,580,726	ELF1 (ENSG00000120690)	13:40931924-41061440
					SUGT1	29,588,389-29,631,935	SUGT1 (ENSG00000165416)	13:52652709-52700909
					CNMD	29,657,454-29,690,422	CNMD (ENSG00000136110)	13:52703264-52739820
					PCDH8	29,785,234-29,789,935	PCDH8 (ENSG00000136099)	13:52842889-52848641
					OLFM4	29,992,831-30,016,322	OLFM4 (ENSG00000102837)	13:53028813-53052057
A1	CHRA1.35096216	31,080,887	intergenic between OLFM4 and LOC102901923	A1:30,080,887-32,080,887	LOC102901923	31,217,042-31,235,475
A1	CHRA1.87876182	74,262,275	intergenic between SLC10A2 and LOC101086443	A1:73,262,275-75,262,275	TPP2	73,323,999-73,392,084	TPP2 (ENSG00000134900)	13:102596958-102679958
					METTL21C	73,398,345-73,407,139	METTL21C (ENSG00000139780)	13:102685747-102695044
					TEX30	73,484,208-73,491,022	TEX30 (ENSG00000151287)	13:102765888-102773811
					POGLUT2	73,508,402-73,523,365	POGLUT2 (ENSG00000134901)	13:102784281-102799040
					SLC10A2	73,755,036-73,774,055	SLC10A2 (ENSG00000125255)	13:103043998-103066417	variant near SLC10A2 significantly associated with LOAD in GWAS (34)
					LOC101086443	74,816,035..74,816,680
D1	CHRUN5.1424878	30,498,477	within IGSF9B (intronic)	D1:29,498,477-31,498,477	OPCML	29,006,834-30,078,295	OPCML (ENSG00000183715)	11:132414977-133532501
					SPATA19	30,419,445-30,424,982	SPATA19 (ENSG00000166118)	11:133840631-133845538
					IGSF9B	30,465,360-30,516,418	IGSF9B (ENSG00000080854)	11:133896438-133956968
					JAM3	30,631,269-30,717,209	JAM3 (ENSG00000166086)	11:134069071-134152001
					NCAPD3	30,717,210-30,783,427	NCAPD3 (ENSG00000151503)	11:134150113-134225504
					VPS26B	30,784,516-30,806,958	VPS26B (ENSG00000151502)	11:134224671-134247788
					THYN1	30,807,401-30,813,094	THYN1 (ENSG00000151500)	11:134248279-134253370
					ACAD8	30,813,121-30,829,811	ACAD8 (ENSG00000151498)	11:134253548-134265855
					B3GAT1	31,171,096-31,201,562	B3GAT1 (ENSG00000109956)	11:134378504-134412242
D1	CHRD1.83154354	52,619,208	intergenic between LOC123380235 and TENM4	D1:51,619,208-53,619,208	LOC123380235	53,039,904-53,784,844
					TENM4	53,039,904-53,784,844	TENM4 (ENSG00000149256)	11:78652829-79441030
D1	CHRD1.112359805	75,099,182	within NAV2 (intronic)	D1:74,065,786-76,065,786	TPH1	74,091,374-74,125,671	TPH1 (ENSG00000129167)	11:18017555-18046269
					SAAL1	74,148,118-74,175,537	SAAL1 (ENSG00000166788)	11:18069935-18106087
					SAA1	74,193,158-74,196,364			Mutation in SAA1 promoter causes heridatary AA-amyloidosis (22)
					HPS5	74,220,513-74,280,965	HPS5 (ENSG00000110756)	11:18278668-18322198	Region harboring SAA1, HPS5, GTF2H1, LDHA, LDHC has major impact on SAA (35)
					GTF2H1	74,280,919-74,318,855	GTF2H1 (ENSG00000110768)	11:18322295-18367045
					LDHA	74,338,285-74,349,667	LDHA (ENSG00000134333)	11:18394560-18408425
					LDHC	74,353,740-74,397,837	LDHC (ENSG00000166796)	11:18412318-18452063
					TSG101	74,398,194-74,455,886	TSG101 (ENSG00000074319)	11:18468336-18526951
					UEVLD	74,461,128-74,512,883	UEVLD (ENSG00000151116)	11:18529609-18588747
					SPTY2D1	74,527,729-74,549,202	SPTY2D1 (ENSG00000179119)	11:18606403-18634791
					TMEM86A	74,574,253-74,578,661	TMEM86A (ENSG00000151117)	11:18693122-18704785
					IGSF22	74,579,730-74,597,754	IGSF22 (ENSG00000179057)	11:18704312-18726230
					PTPN5	74,601,603-74,657,494	PTPN5 (ENSG00000110786)	11:18727928-18792721
					ZDHHC13	74,760,625-74,812,445	ZDHHC13 (ENSG00000177054)	11:19117099-19176422	Mutation in ZDHHC13 caused severe phenotype in mice including alopecia, osteopetrosis and systemic amyloidosis (AA- and AL-) (23)
					CSRP3	74,820,179-74,839,411	CSRP3 (ENSG00000129170)	11:19182030-19210571
					E2F8	74,860,730-74,877,825	E2F8 (ENSG00000129173)	11:19224063-19241620
					NAV2	74,972,657-75,715,458	NAV2 (ENSG00000166833)	11:19350724-20121601
					DBX1	75,741,071-75,746,453	DBX1 (ENSG00000109851)	11:20156155-20160475
					HTATIP2	75,916,774-75,931,077	HTATIP2 (ENSG00000109854)	11:20363685-20383782
					PRMT3	75,933,851-76,077,043	PRMT3 (ENSG00000185238)	11:20387558-20509338
D2	CHRD2.113529492	84,125,513	intergenic between MKI67 and MGMT	D2:83,125,430-85,125,480	PTPRE	83,094,722-83,258,667	PTPRE (ENSG00000132334)	10:127907103-128085855	PTPRE plays a role in thyroid carcinoma (36)	Deletion in PTPRE in both Abyssinian cases in multi-omic study (14)
					MKI67	83,263,447-83,291,571
					MGMT	84,500,253-84,798,944	MGMT (ENSG00000170430)	10:129467190-129770983
					EBF3	84,865,380-84,993,258	EBF3 (ENSG00000108001)	10:129835233-129973053
					CD2H10orf143	85,044,379-85,110,964	C10orf143 (ENSG00000237489)	10:130020025-130110830
D3	CHRA1.170535359	12,578,042	intergenic between TBX3 and MED13L	D3:11,578,042-13,578,042	TBX5	11,638,577-11,723,651	TBX5 (ENSG00000089225)	12:114353911-114408442
					TBX3	11,861,899-11,874,303	TBX3 (ENSG00000135111)	12:114670255-114684175
					MED13L	12,939,097-13,246,531	MED13L (ENSG00000123066)	12:115957905-116277693
					SPRING1	13,425,617-13,604,642	SPRING1 (ENSG00000111412)	12:116710171-116738070
